# Supplementary material
Source: PubMed Central journal article supplement (PMC1458515)

## Supplementary Materials

**Supplementary Table 1.** Nucleotide frequencies (%) at different codon sites in a non-redundant set of 19317 human mRNAs.

---

| Nucleotide | Codon site 1 | Codon site 2 | Codon site 3 |
|------------|--------------|--------------|--------------|
| A          | 0.2666       | 0.3094       | 0.1908       |
| U          | 0.1731       | 0.2633       | 0.2156       |
| G          | 0.3132       | 0.1941       | 0.2923       |
| C          | 0.2470       | 0.2333       | 0.3013       |

---

**Supplementary Table 2.** Dinucleotide frequencies (%) at three codon sites in abundant and rare human mRNAs. Dinucleotide frequencies were calculated from a non-redundant set of 19317 human mRNAs, 3227 abundant mRNAs ( $\geq 108$  ESTs in GenBank) and 3639 rare mRNAs (1-15 ESTs in GenBank). Frequencies of CC, UG, CA at codon sites [1,2], GG at sites [2,3] and CC at positions [3,1] are significantly enhanced, while levels of AA and GA at positions [1,2] and UG at sites [3,1] are significantly reduced in highly abundant transcripts relatively to low abundant transcripts.

| Dinucleotide | Sites [1,2] |       |       | Sites [2,3] |       |       | Sites [3,1] |       |       |
|--------------|-------------|-------|-------|-------------|-------|-------|-------------|-------|-------|
|              | Abund       | Rare  | All   | Abund       | Rare  | All   | Abund       | Rare  | All   |
| CG           | 3.15        | 3.35  | 3.38  | 2.91        | 2.44  | 2.68  | 4.28        | 4.22  | 4.19  |
| GC           | 6.99        | 7.30  | 7.11  | 7.24        | 6.22  | 6.70  | 7.69        | 7.05  | 7.59  |
| UA           | 2.85        | 3.07  | 2.90  | 2.83        | 2.66  | 2.82  | 3.39        | 3.72  | 3.55  |
| AU           | 6.49        | 7.05  | 6.63  | 5.59        | 6.43  | 6.02  | 2.87        | 2.60  | 2.73  |
| CC           | 6.57        | 5.86  | 6.19  | 8.83        | 8.20  | 8.47  | 8.97        | 8.00  | 8.61  |
| GG           | 6.92        | 6.88  | 6.69  | 5.77        | 4.86  | 5.37  | 9.96        | 10.21 | 10.16 |
| UU           | 5.82        | 5.61  | 5.73  | 5.39        | 5.83  | 5.58  | 3.85        | 3.47  | 3.65  |
| AA           | 8.68        | 10.20 | 9.32  | 6.35        | 6.88  | 6.67  | 4.96        | 4.86  | 4.96  |
| UG           | 4.61        | 3.30  | 3.89  | 10.32       | 10.25 | 10.37 | 8.85        | 10.61 | 9.58  |
| CA           | 7.39        | 6.77  | 7.23  | 5.89        | 5.83  | 5.90  | 10.22       | 10.77 | 10.33 |
| AG           | 5.99        | 5.04  | 5.57  | 10.11       | 11.46 | 10.84 | 6.99        | 7.76  | 7.43  |
| CU           | 8.26        | 7.34  | 7.93  | 6.19        | 6.43  | 6.24  | 7.66        | 6.57  | 7.03  |
| AC           | 5.20        | 5.16  | 5.17  | 7.32        | 7.68  | 7.50  | 3.78        | 3.59  | 3.73  |
| GU           | 5.71        | 6.21  | 5.98  | 3.84        | 3.78  | 3.75  | 3.95        | 3.92  | 3.92  |
| GA           | 10.46       | 12.41 | 11.58 | 3.82        | 3.72  | 3.71  | 7.42        | 7.77  | 7.53  |
| UC           | 5.05        | 4.57  | 4.81  | 7.74        | 7.47  | 7.50  | 4.92        | 4.67  | 4.81  |

**Supplementary Table 3.** Trinucleotide frequencies in abundant and rare human mRNAs. Trinucleotide frequencies were calculated from a non-redundant set of 19317 human mRNAs (All), 3227 abundant mRNAs ( $\geq 108$  ESTs in GenBank) and 3639 rare mRNAs (1-15 ESTs in GenBank). mRNA sequences with complete CDSs and at least 30 nt 5'UTRs and 3'UTRs were used in this analysis. Frequencies of codons for histidine, proline, cysteine and tryptophan are significantly enhanced, and codon frequencies for lysine, asparagine, aspartate and glutamate are significantly reduced in highly abundant transcripts, as compared to rare transcripts.

---

|       |       |       |       |       |       |       |       |       |       |       |       |       |       |       |       |                 |
|-------|-------|-------|-------|-------|-------|-------|-------|-------|-------|-------|-------|-------|-------|-------|-------|-----------------|
| AAA   | AAC   | AAG   | AAT   | ACA   | ACC   | ACG   | ACT   | AGA   | AGC   | AGG   | AGT   | ATA   | ATC   | ATG   | ATT   |                 |
| 0.025 | 0.019 | 0.033 | 0.016 | 0.014 | 0.018 | 0.006 | 0.013 | 0.012 | 0.020 | 0.012 | 0.012 | 0.007 | 0.021 | 0.023 | 0.015 | Total (19318)   |
| 0.026 | 0.021 | 0.038 | 0.017 | 0.014 | 0.019 | 0.006 | 0.013 | 0.011 | 0.018 | 0.010 | 0.011 | 0.006 | 0.023 | 0.024 | 0.017 | Rare (3639)     |
| 0.023 | 0.018 | 0.030 | 0.015 | 0.014 | 0.019 | 0.006 | 0.013 | 0.013 | 0.021 | 0.014 | 0.012 | 0.008 | 0.020 | 0.023 | 0.014 | Abundant (3228) |
| CAA   | CAC   | CAG   | CAT   | CCA   | CCC   | CCG   | CCT   | CGA   | CGC   | CGG   | CGT   | CTA   | CTC   | CTG   | CTT   |                 |
| 0.012 | 0.015 | 0.034 | 0.011 | 0.017 | 0.020 | 0.008 | 0.017 | 0.006 | 0.011 | 0.012 | 0.005 | 0.007 | 0.020 | 0.040 | 0.013 | Total (19318)   |
| 0.011 | 0.013 | 0.034 | 0.010 | 0.017 | 0.018 | 0.007 | 0.017 | 0.007 | 0.010 | 0.011 | 0.005 | 0.006 | 0.017 | 0.037 | 0.012 | Rare (3639)     |
| 0.013 | 0.017 | 0.033 | 0.011 | 0.018 | 0.022 | 0.009 | 0.018 | 0.005 | 0.011 | 0.011 | 0.004 | 0.007 | 0.021 | 0.041 | 0.013 | Abundant (3228) |
| GAA   | GAC   | GAG   | GAT   | GCA   | GCC   | GCG   | GCT   | GGA   | GGC   | GGG   | GGT   | GTA   | GTC   | GTG   | GTT   |                 |
| 0.029 | 0.025 | 0.040 | 0.021 | 0.016 | 0.028 | 0.008 | 0.018 | 0.017 | 0.023 | 0.017 | 0.011 | 0.007 | 0.014 | 0.028 | 0.011 | Total (19318)   |
| 0.031 | 0.027 | 0.042 | 0.025 | 0.017 | 0.029 | 0.007 | 0.020 | 0.018 | 0.023 | 0.015 | 0.012 | 0.007 | 0.014 | 0.029 | 0.012 | Rare (3639)     |
| 0.026 | 0.023 | 0.037 | 0.018 | 0.015 | 0.029 | 0.009 | 0.017 | 0.017 | 0.024 | 0.018 | 0.010 | 0.006 | 0.015 | 0.027 | 0.010 | Abundant (3228) |
| TAA   | TAC   | TAG   | TAT   | TCA   | TCC   | TCG   | TCT   | TGA   | TGC   | TGG   | TGT   | TTA   | TTC   | TTG   | TTT   |                 |
| 0.001 | 0.015 | 0.001 | 0.012 | 0.012 | 0.017 | 0.005 | 0.014 | 0.002 | 0.014 | 0.013 | 0.011 | 0.007 | 0.020 | 0.013 | 0.017 | Total (19318)   |
| 0.001 | 0.016 | 0.001 | 0.013 | 0.011 | 0.016 | 0.005 | 0.014 | 0.002 | 0.011 | 0.012 | 0.009 | 0.006 | 0.020 | 0.012 | 0.017 | Rare (3639)     |
| 0.001 | 0.015 | 0.001 | 0.012 | 0.012 | 0.019 | 0.005 | 0.014 | 0.002 | 0.017 | 0.015 | 0.013 | 0.007 | 0.022 | 0.012 | 0.017 | Abundant (3228) |

---

**Supplementary Table 4.** Frequencies of trinucleotides ( $F$ ), complementary trinucleotides ( $F_c$ ), base paired trinucleotides ( $f$ ), and base paired complementary trinucleotides ( $f_c$ ) at codon sites [2,3,1]. The 3<sup>rd</sup> four-fold degenerate codon positions are boldfaced.

| Trinucleotides |       |       | Complementary trinucleotides |       |       |
|----------------|-------|-------|------------------------------|-------|-------|
| Sequence       | $F$   | $f$   | Sequence                     | $F_c$ | $f_c$ |
| CCA            | 0.542 | 0.676 | TGG                          | 0.618 | 0.723 |
| CCC            | 0.385 | 0.375 | GGG                          | 0.312 | 0.417 |
| CCG            | 0.144 | 0.127 | CGG                          | 0.132 | 0.125 |
| GCA            | 0.376 | 0.436 | TGC                          | 0.470 | 0.577 |
| GCC            | 0.372 | 0.313 | GGC                          | 0.316 | 0.446 |
| GCG            | 0.158 | 0.145 | CGC                          | 0.131 | 0.161 |
| TCA            | 0.352 | 0.371 | TGA                          | 0.413 | 0.470 |
| TCC            | 0.246 | 0.209 | GGA                          | 0.282 | 0.334 |
| TCG            | 0.068 | 0.037 | CGA                          | 0.060 | 0.040 |
| x <b>C</b> x   | 0.293 | 0.299 | x <b>G</b> x                 | 0.304 | 0.366 |
| CTA            | 0.164 | 0.131 | TAG                          | 0.119 | 0.096 |
| CTC            | 0.268 | 0.256 | GAG                          | 0.303 | 0.263 |
| CTG            | 0.376 | 0.381 | CAG                          | 0.349 | 0.367 |
| GTA            | 0.086 | 0.067 | TAC                          | 0.090 | 0.059 |
| GTC            | 0.137 | 0.115 | GAC                          | 0.175 | 0.124 |
| GTG            | 0.226 | 0.175 | CAC                          | 0.216 | 0.208 |
| TTA            | 0.122 | 0.095 | TAA                          | 0.113 | 0.065 |
| TTC            | 0.194 | 0.155 | GAA                          | 0.257 | 0.163 |
| TTG            | 0.196 | 0.144 | CAA                          | 0.235 | 0.153 |
| x <b>T</b> x   | 0.197 | 0.169 | x <b>A</b> x                 | 0.206 | 0.166 |

**Supplementary Table 5.** Differences in base pairing levels ( $\Delta f$ ) between codon sites [1,2], [2,3], and [3,1] in the human mRNAs and in randomized sequences.

| Sequences   | Codon sites [1,2] |                   | Codon sites [2,3] |                    | Codon sites [3,1] |                    |
|-------------|-------------------|-------------------|-------------------|--------------------|-------------------|--------------------|
|             | $\Delta f_{1,2}$  | <i>P</i> -value   | $\Delta f_{2,3}$  | <i>P</i> -value    | $\Delta f_{3,1}$  | <i>P</i> -value    |
| Real mRNAs  | .01365±.00047     |                   | .02272±.00047     |                    | .00907±.00047     |                    |
| Random CC   | .01112±.00045     | 10 <sup>-1</sup>  | .00537±.00044     | 10 <sup>-124</sup> | -.00576±.00044    | 10 <sup>-120</sup> |
| Random NS   | .00042±.00046     | 10 <sup>-82</sup> | .00051±.00046     | 10 <sup>-255</sup> | .00019±.00046     | 10 <sup>-45</sup>  |
| Random CSx4 | .01128±.00047     | 10 <sup>-3</sup>  | .01609±.00047     | 10 <sup>-20</sup>  | .00480±.00047     | 10 <sup>-9</sup>   |
| Random CCx4 | .01101±.00046     | 10 <sup>-3</sup>  | .01199±.00045     | 10 <sup>-43</sup>  | .00097±.00045     | 10 <sup>-29</sup>  |
| Random DCS  | .01307±.00045     | 0.2               | .02141±.00045     | 0.03               | .00834±.00046     | 0.12               |
| Random DNS  | .00026±.00045     | 10 <sup>-89</sup> | .00007±.00045     | 10 <sup>-272</sup> | .00019±.00045     | 10 <sup>-44</sup>  |

Abbreviations: Real mRNAs, coding sequences of 19,317 native human mRNA; Random CC, mRNA sequences with randomly chosen synonymous codons; Random NS, sequences with randomly shuffled nucleotides and the same nucleotide composition as native mRNAs; Random CSx4, sequences with shuffled 4-fold degenerate synonymous codons; Random CCx4, sequences with randomly chosen 4-fold degenerate synonymous codons; Random DCS, dicodone shuffling that preserved dinucleotide frequencies, encoded amino acid sequence, and codon usage of native mRNAs; Random DNS, random shuffling of all dinucleotides that retained nucleotide composition of native mRNAs. Start and stop codons were excluded from this analysis.

**Supplementary Figure 1.** Profiles of nucleotide involvement in different secondary structure elements around the start codon (**A** and **C**) and the stop codon (**B** and **D**) in 19,317 human mRNAs (**A** and **B**) and 20,892 mouse mRNAs (**C** and **D**). Positions from -30 to -1 correspond to 5'UTRs and positions from 1 to 30 correspond to CDSs. Blue, base paired nucleotides; red, nucleotides in multi-branch loops; green, nucleotides in internal loops; black, nucleotides in hairpins.

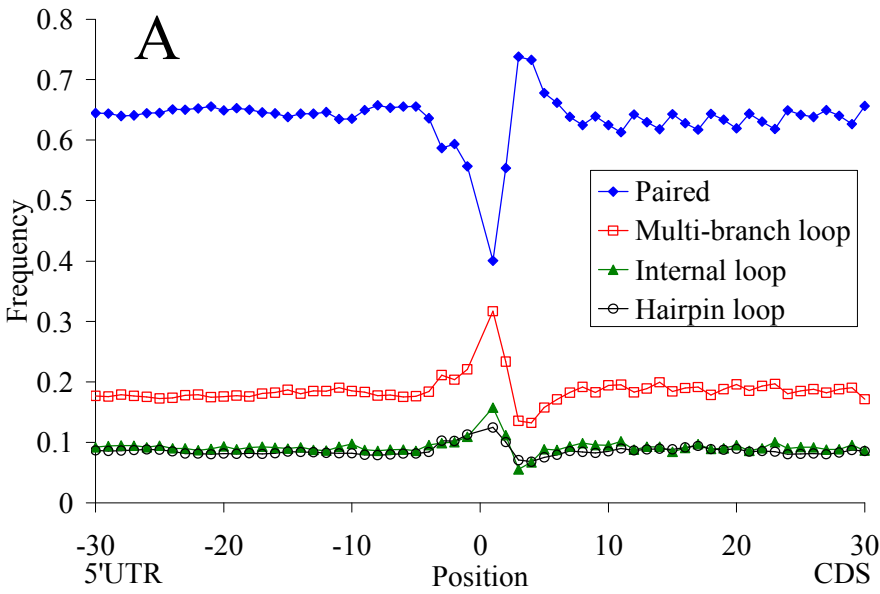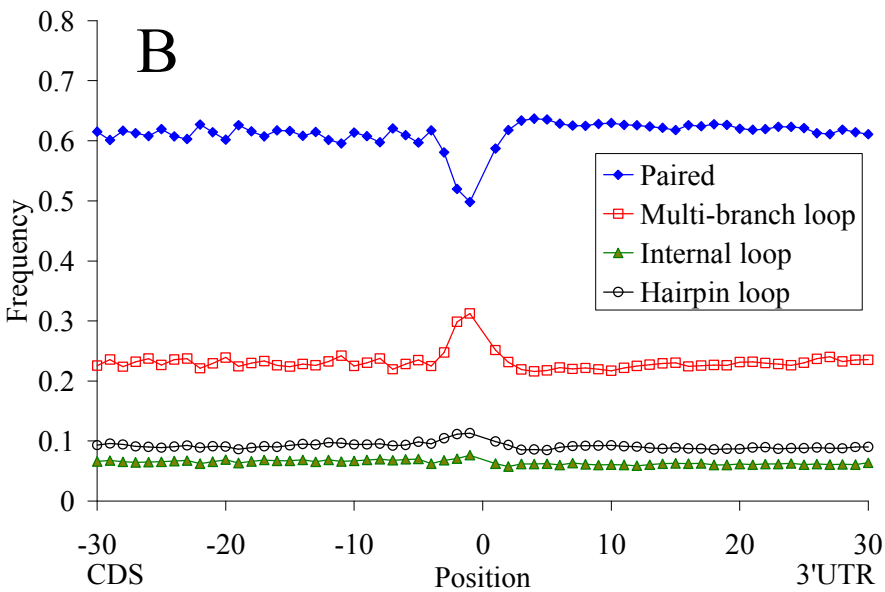

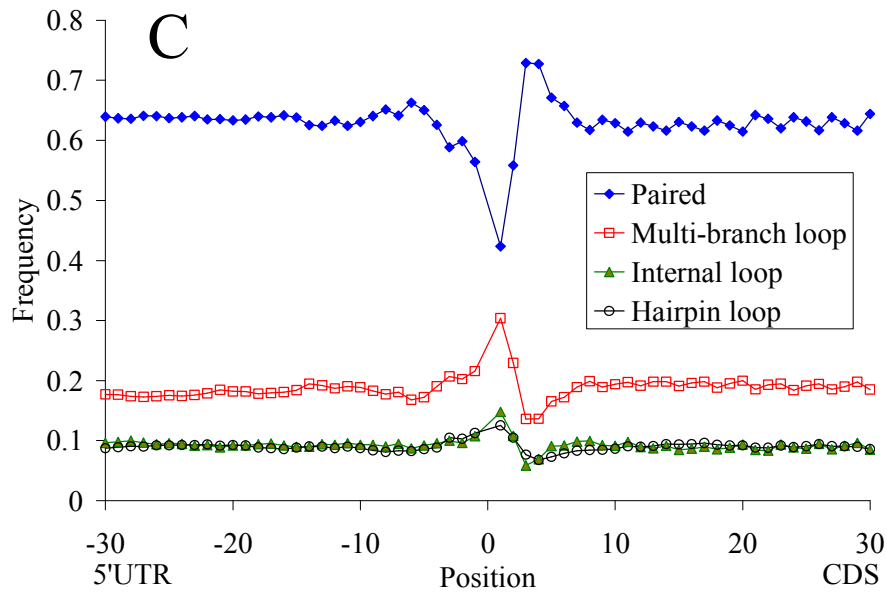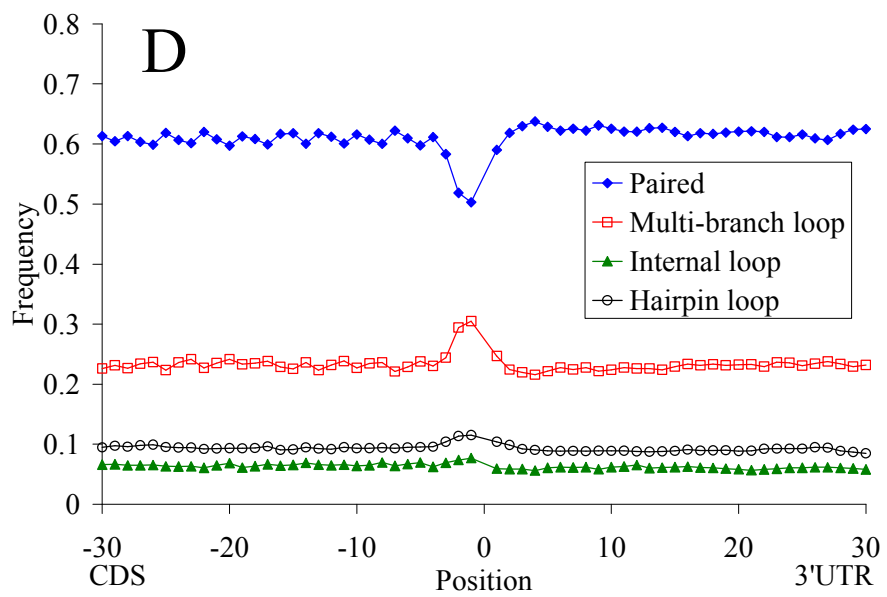

**Supplementary Figure 2.** Summarized histogram of nucleotide base pairing for 622 human tRNAs. Sequences of tRNAs were computationally folded as described in Materials and Methods. Eight major peaks on the histogram correspond to eight canonical tRNA stem structures.

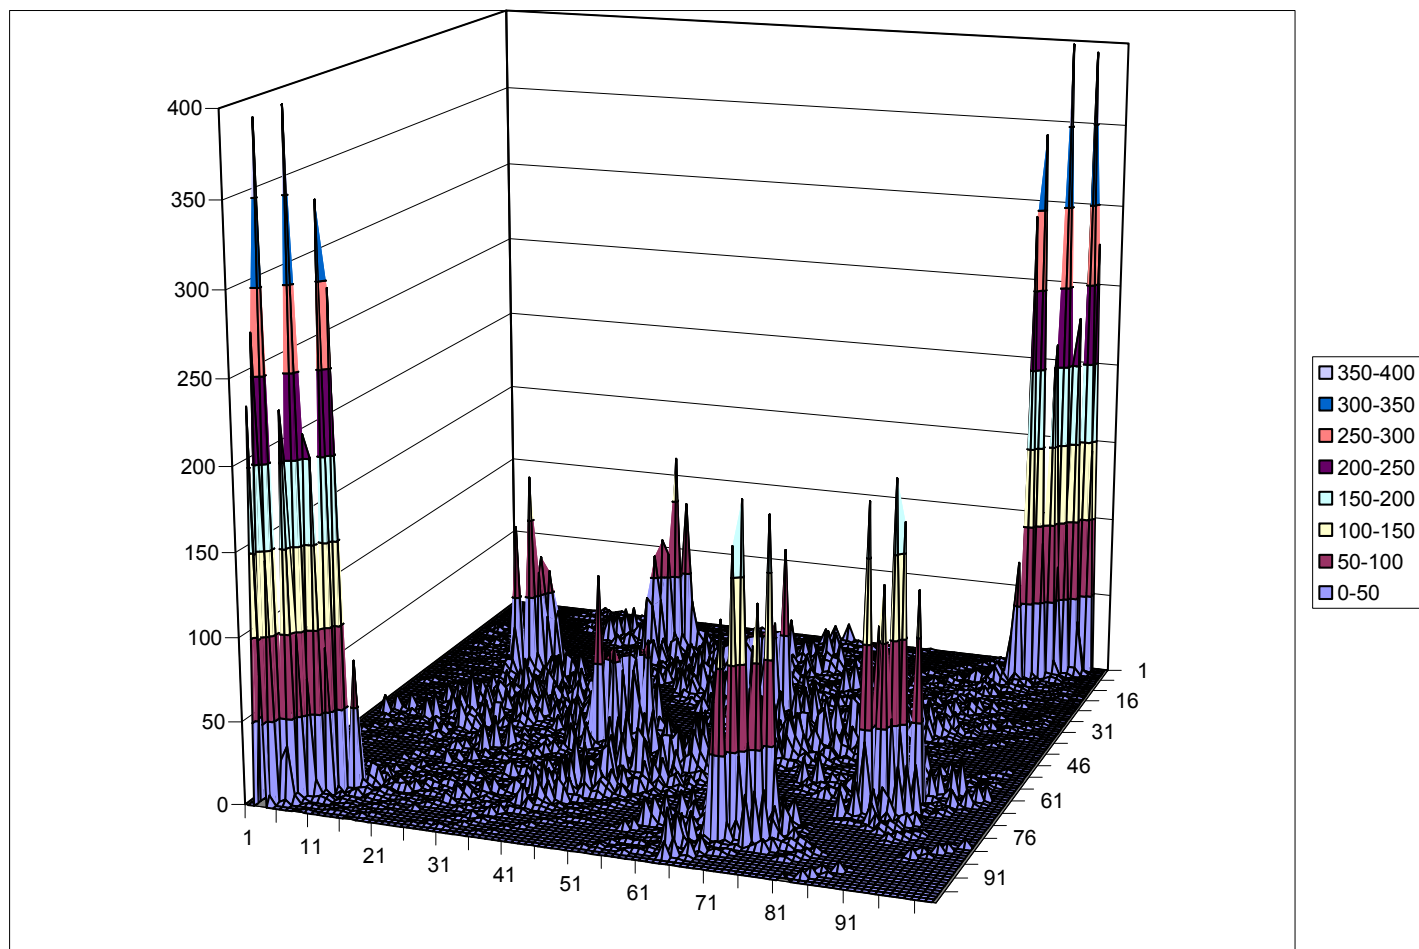

Supplement: nar_34_8_2428__1.pdf [file nar_34_8_2428__1.pdf]
